# Supplementary material for: A hydrophobic disordered peptide spontaneously anchors a covalently bound RNA hairpin to giant lipidic vesicles
Source: Royal Society of Chemistry journal article supplement (doi:10.1039/c4ob00721b), 2014-01-01
Supplement: c4ob00721b5.pdf [file c4ob00721b5.pdf]

Epifluorescence microscopy image of giant vesicles

naturally swelled from

0.5 mM POPC / 5 % DP-6'-dansylamino-6'-deoxy- $\beta$ -D-glucoside

UV excitation

in the centre :

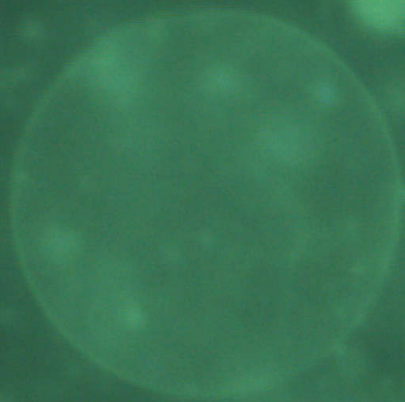

GUV

approximately 25  $\mu$ m diameter
