# Supplementary figures and images for: A hydrophobic disordered peptide spontaneously anchors a covalently bound RNA hairpin to giant lipidic vesicles
Source: Royal Society of Chemistry journal article supplement (doi:10.1039/c4ob00721b), 2014-01-01

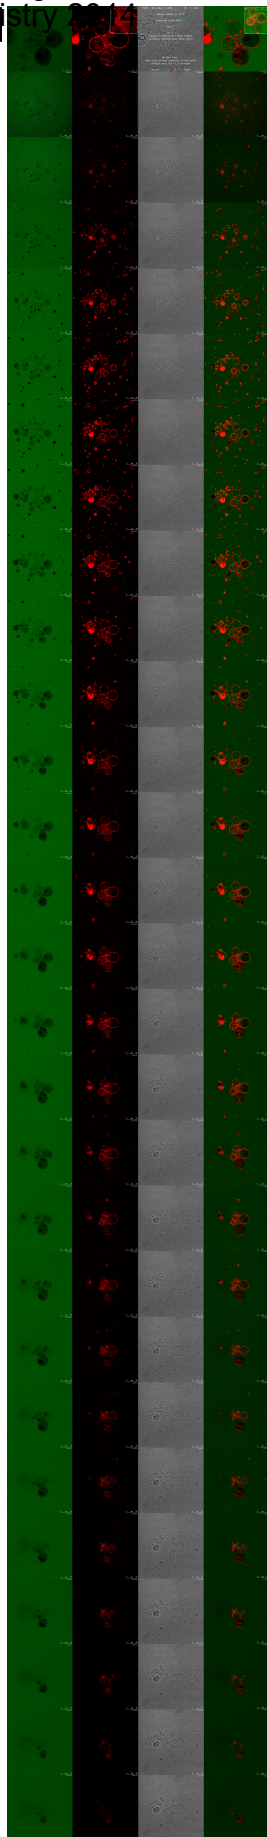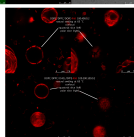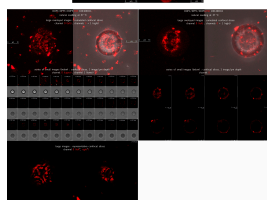

Supplement: c4ob00721b2.pdf [file c4ob00721b2.pdf]

IFS3

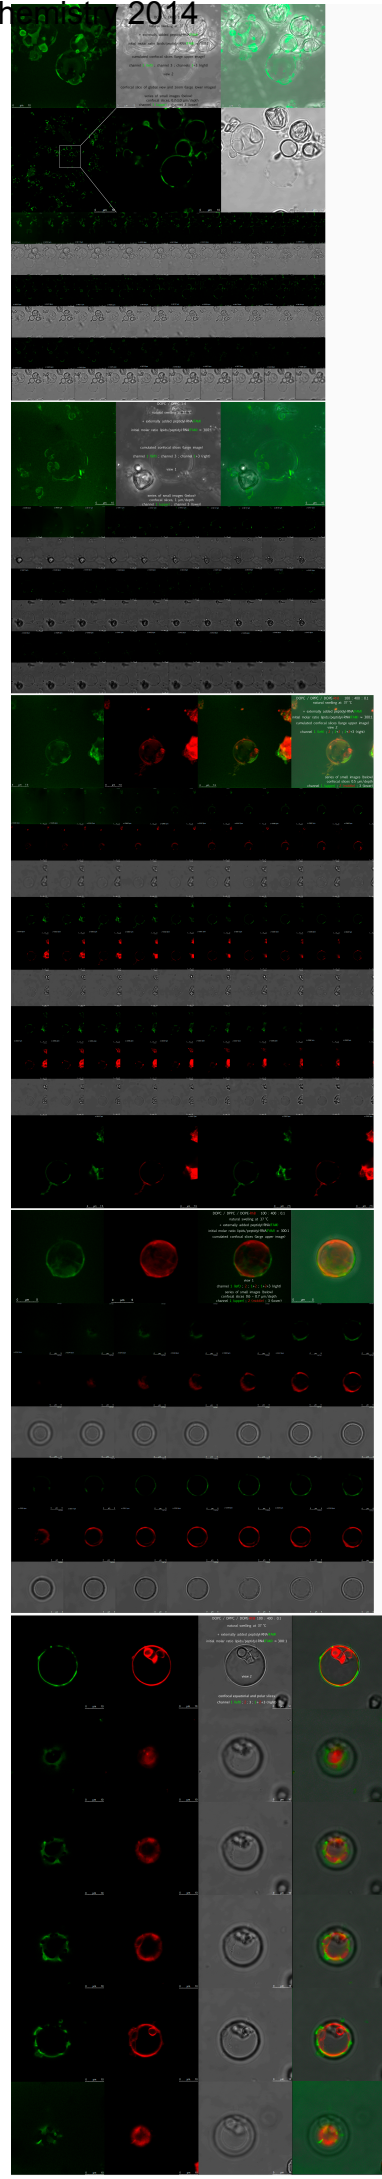

Supplement: c4ob00721b3.pdf [file c4ob00721b3.pdf]

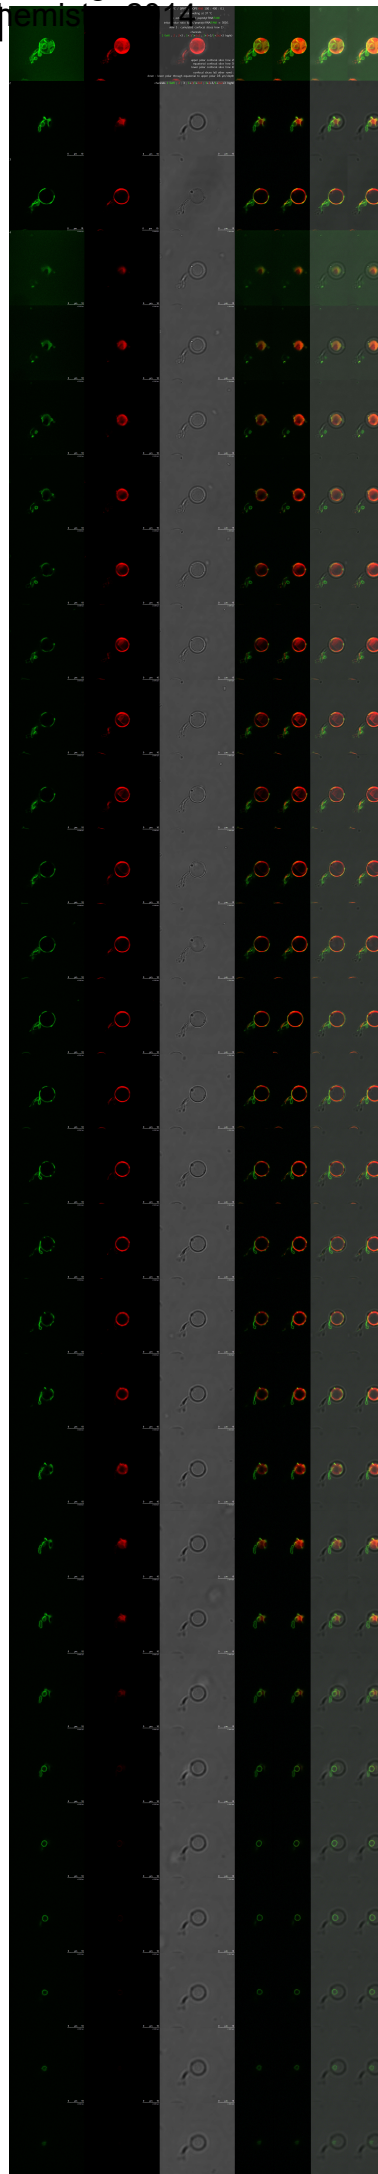

Supplement: c4ob00721b4.pdf [file c4ob00721b4.pdf]
